# Supplementary material for: Circular economy approach in phosphorus fertilization based on vivianite must be tailored to soil properties
Source: Copernicus journal article supplement (doi:10.5194/soil-11-975-2025), 2025-11-28
Supplement: Supplementary file 1 [file Table S1.pdf › Supplementary tables/Table S1.pdf]

**Table S1. Effect of the interaction between fertilizer treatments and soil on dry matter yield (DM) and P uptake by crop, and Olsen P and DTPA extractable Fe after crop**

| Soil   | Fertilizer | n | DM yield              |      | P uptake                |      | Olsen P             |     | DTPA Fe |     |
|--------|------------|---|-----------------------|------|-------------------------|------|---------------------|-----|---------|-----|
|        |            |   | g plant <sup>-1</sup> |      | mg planta <sup>-1</sup> |      | mg kg <sup>-1</sup> |     |         |     |
| Soil 1 | Control    | 3 | 0,56 ±                | 0,07 | 0,54 ±                  | 0,10 | 16,9 ±              | 2,9 | 5,6 ±   | 0,5 |
|        | SP 100     | 3 | 0,49 ±                | 0,08 | 0,33 ±                  | 0,04 | 54,7 ±              | 8,7 | 5,8 ±   | 0,7 |
|        | SP 50      | 3 | 0,54 ±                | 0,09 | 0,93 ±                  | 0,44 | 40,3 ±              | 6,2 | 5,7 ±   | 0,3 |
|        | Viv 100    | 3 | 0,58 ±                | 0,03 | 0,43 ±                  | 0,06 | 17,3 ±              | 1,9 | 6,6 ±   | 0,5 |
|        | Viv 50     | 3 | 0,44 ±                | 0,05 | 0,40 ±                  | 0,13 | 16,0 ±              | 0,4 | 5,6 ±   | 0,4 |
| Soil 2 | Control    | 3 | 1,03 ±                | 0,17 | 1,20 ±                  | 0,31 | 15,9 ±              | 2,2 | 3,8 ±   | 0,2 |
|        | SP 100     | 3 | 1,74 ±                | 0,11 | 4,79 ±                  | 0,29 | 61,6 ±              | 5,5 | 4,8 ±   | 0,9 |
|        | SP 50      | 3 | 1,67 ±                | 0,17 | 2,84 ±                  | 0,27 | 29,9 ±              | 0,4 | 3,6 ±   | 0,1 |
|        | Viv 100    | 3 | 1,03 ±                | 0,08 | 1,07 ±                  | 0,23 | 13,4 ±              | 0,4 | 5,5 ±   | 1,3 |
|        | Viv 50     | 3 | 0,97 ±                | 0,06 | 1,03 ±                  | 0,23 | 12,1 ±              | 0,4 | 3,9 ±   | 0,3 |
| Soil 3 | Control    | 3 | 0,98 ±                | 0,16 | 1,27 ±                  | 0,09 | 8,9 ±               | 0,9 | 5,4 ±   | 0,3 |
|        | SP 100     | 3 | 1,50 ±                | 0,18 | 4,13 ±                  | 0,49 | 51,3 ±              | 7,6 | 4,8 ±   | 0,2 |
|        | SP 50      | 3 | 1,56 ±                | 0,22 | 3,20 ±                  | 0,45 | 23,6 ±              | 1,7 | 4,9 ±   | 0,2 |
|        | Viv 100    | 3 | 1,05 ±                | 0,28 | 1,45 ±                  | 0,42 | 11,1 ±              | 0,2 | 5,9 ±   | 0,3 |
|        | Viv 50     | 3 | 1,14 ±                | 0,18 | 1,60 ±                  | 0,38 | 9,6 ±               | 0,2 | 4,7 ±   | 0,5 |
| Soil 4 | Control    | 3 | 0,99 ±                | 0,08 | 1,61 ±                  | 0,13 | 9,3 ±               | 2,5 | 3,5 ±   | 0,1 |
|        | SP 100     | 3 | 1,89 ±                | 0,15 | 4,63 ±                  | 0,53 | 49,1 ±              | 6,5 | 3,6 ±   | 0,1 |
|        | SP 50      | 3 | 1,70 ±                | 0,16 | 3,58 ±                  | 0,48 | 27,4 ±              | 3,4 | 3,8 ±   | 0,2 |
|        | Viv 100    | 3 | 0,99 ±                | 0,04 | 1,49 ±                  | 0,20 | 8,9 ±               | 0,2 | 4,0 ±   | 0,1 |
|        | Viv 50     | 3 | 1,23 ±                | 0,11 | 1,88 ±                  | 0,17 | 7,9 ±               | 0,3 | 3,8 ±   | 0,1 |
| Soil 5 | Control    | 3 | 1,64 ±                | 0,22 | 2,86 ±                  | 0,62 | 33,3 ±              | 3,5 | 9,3 ±   | 0,4 |
|        | SP 100     | 3 | 1,72 ±                | 0,17 | 5,20 ±                  | 0,67 | 76,2 ±              | 8,6 | 9,8 ±   | 1,2 |
|        | SP 50      | 3 | 1,80 ±                | 0,10 | 4,31 ±                  | 0,33 | 52,0 ±              | 0,5 | 9,3 ±   | 0,3 |
|        | Viv 100    | 3 | 1,50 ±                | 0,11 | 2,31 ±                  | 0,19 | 32,3 ±              | 0,5 | 9,4 ±   | 0,1 |
|        | Viv 50     | 3 | 1,60 ±                | 0,13 | 2,90 ±                  | 0,28 | 30,3 ±              | 0,4 | 9,2 ±   | 0,2 |
| Soil 6 | Control    | 3 | 1,82 ±                | 0,15 | 3,44 ±                  | 0,38 | 15,1 ±              | 0,7 | 7,1 ±   | 0,2 |
|        | SP 100     | 3 | 2,21 ±                | 0,25 | 5,62 ±                  | 0,93 | 49,0 ±              | 6,2 | 8,0 ±   | 0,9 |
|        | SP 50      | 3 | 2,26 ±                | 0,02 | 4,40 ±                  | 0,15 | 30,6 ±              | 2,2 | 7,2 ±   | 0,3 |
|        | Viv 100    | 3 | 1,52 ±                | 0,18 | 2,34 ±                  | 0,23 | 16,2 ±              | 1,0 | 6,8 ±   | 0,2 |
|        | Viv 50     | 3 | 1,75 ±                | 0,12 | 2,27 ±                  | 0,08 | 19,5 ±              | 1,9 | 7,1 ±   | 0,1 |
| Soil 7 | Control    | 3 | 1,23 ±                | 0,10 | 1,48 ±                  | 0,13 | 12,8 ±              | 0,8 | 50,1 ±  | 2,9 |
|        | SP 100     | 3 | 1,62 ±                | 0,16 | 4,99 ±                  | 0,48 | 37,2 ±              | 1,7 | 42,6 ±  | 3,8 |
|        | SP 50      | 3 | 1,66 ±                | 0,13 | 3,61 ±                  | 0,14 | 25,6 ±              | 0,7 | 43,2 ±  | 1,6 |
|        | Viv 100    | 3 | 1,32 ±                | 0,20 | 1,55 ±                  | 0,37 | 17,2 ±              | 0,5 | 55,3 ±  | 0,8 |
|        | Viv 50     | 3 | 1,32 ±                | 0,08 | 1,50 ±                  | 0,02 | 16,7 ±              | 1,6 | 54,4 ±  | 1,9 |
| Soil 8 | Control    | 3 | 0,63 ±                | 0,01 | 0,75 ±                  | 0,09 | 7,3 ±               | 0,4 | 20,6 ±  | 1,9 |
|        | SP 100     | 3 | 1,99 ±                | 0,24 | 5,01 ±                  | 0,45 | 36,3 ±              | 2,5 | 21,3 ±  | 1,2 |
|        | SP 50      | 3 | 1,88 ±                | 0,04 | 3,04 ±                  | 0,01 | 22,4 ±              | 3,6 | 19,2 ±  | 2,0 |
|        | Viv 100    | 3 | 1,28 ±                | 0,09 | 1,46 ±                  | 0,22 | 23,0 ±              | 2,4 | 54,7 ±  | 2,7 |
|        | Viv 50     | 3 | 1,30 ±                | 0,17 | 1,29 ±                  | 0,30 | 16,1 ±              | 0,8 | 47,5 ±  | 6,1 |
| Soil 9 | Control    | 3 | 1,08 ±                | 0,02 | 1,31 ±                  | 0,13 | 7,8 ±               | 1,8 | 44,4 ±  | 1,2 |
|        | SP 100     | 3 | 1,91 ±                | 0,11 | 4,02 ±                  | 0,61 | 23,8 ±              | 2,2 | 43,8 ±  | 1,1 |
|        | SP 50      | 3 | 1,47 ±                | 0,01 | 2,16 ±                  | 0,12 | 14,2 ±              | 1,4 | 44,1 ±  | 1,8 |

|         |         |   |      |   |      |      |   |      |      |   |      |      |   |     |
|---------|---------|---|------|---|------|------|---|------|------|---|------|------|---|-----|
|         | Viv 100 | 3 | 1,47 | ± | 0,13 | 1,63 | ± | 0,11 | 19,9 | ± | 3,7  | 75,0 | ± | 2,0 |
|         | Viv 50  | 3 | 1,18 | ± | 0,12 | 1,55 | ± | 0,44 | 11,0 | ± | 0,4  | 55,8 | ± | 5,0 |
| Soil 10 | Control | 3 | 1,31 | ± | 0,09 | 1,37 | ± | 0,20 | 12,9 | ± | 3,4  | 42,6 | ± | 0,5 |
|         | SP 100  | 3 | 1,97 | ± | 0,10 | 5,84 | ± | 0,50 | 31,2 | ± | 1,3  | 38,6 | ± | 4,5 |
|         | SP 50   | 3 | 1,81 | ± | 0,04 | 5,30 | ± | 1,98 | 16,1 | ± | 3,7  | 39,8 | ± | 2,0 |
|         | Viv 100 | 3 | 1,58 | ± | 0,15 | 1,91 | ± | 0,17 | 21,6 | ± | 1,2  | 69,4 | ± | 2,6 |
|         | Viv 50  | 3 | 1,32 | ± | 0,14 | 1,90 | ± | 0,33 | 16,3 | ± | 0,4  | 58,8 | ± | 0,5 |
| Soil 11 | Control | 3 | 1,83 | ± | 0,02 | 2,24 | ± | 0,12 | 16,0 | ± | 2,1  | 14,2 | ± | 0,1 |
|         | SP 100  | 3 | 2,09 | ± | 0,14 | 6,06 | ± | 0,53 | 37,3 | ± | 11,8 | 14,6 | ± | 1,1 |
|         | SP 50   | 3 | 2,00 | ± | 0,19 | 3,90 | ± | 0,38 | 21,0 | ± | 2,0  | 15,2 | ± | 0,8 |
|         | Viv 100 | 3 | 1,55 | ± | 0,03 | 2,15 | ± | 0,23 | 13,3 | ± | 1,0  | 14,6 | ± | 0,9 |
|         | Viv 50  | 3 | 1,68 | ± | 0,26 | 1,97 | ± | 0,35 | 13,8 | ± | 0,7  | 16,0 | ± | 0,9 |
| Soil 12 | Control | 3 | 1,40 | ± | 0,06 | 1,58 | ± | 0,18 | 20,6 | ± | 2,6  | 5,5  | ± | 0,1 |
|         | SP 100  | 3 | 1,75 | ± | 0,07 | 5,46 | ± | 0,36 | 68,9 | ± | 3,4  | 5,5  | ± | 0,2 |
|         | SP 50   | 3 | 1,65 | ± | 0,17 | 4,30 | ± | 0,18 | 36,0 | ± | 2,4  | 5,3  | ± | 0,3 |
|         | Viv 100 | 3 | 1,49 | ± | 0,20 | 1,77 | ± | 0,05 | 18,5 | ± | 0,4  | 5,9  | ± | 0,2 |
|         | Viv 50  | 3 | 1,36 | ± | 0,03 | 1,75 | ± | 0,09 | 20,1 | ± | 2,3  | 5,7  | ± | 0,1 |

---

Mean ± standard error

Number after fertilizer indicates the P rate in mg kg<sup>-1</sup> of soil
