# Supplementary material for: Circular economy approach in phosphorus fertilization based on vivianite must be tailored to soil properties
Source: Copernicus journal article supplement (doi:10.5194/soil-11-975-2025), 2025-11-28
Supplement: Supplementary file 2 [file Table S2.pdf › Supplementary tables/Table S2.pdf]

**Table S2. Effect of soils on the mineral P fertilizer replacement value (PFRV) expressed in % estimated based on different approaches (DM yield, P uptake, Olsen P) and on the increase in the DTPA extractable Fe after crop for both P fertilizer rates (50 and 100 mg P kg<sup>-1</sup> soil)**

| Soil    | n | PFRV <sub>DM</sub>     |                         |    | PFRV <sub>P Uptake</sub> |                         |          | PFRV <sub>Olsen P</sub> |                         |         | Increase in DTPA extractable Fe |         |                         |         |              |         |
|---------|---|------------------------|-------------------------|----|--------------------------|-------------------------|----------|-------------------------|-------------------------|---------|---------------------------------|---------|-------------------------|---------|--------------|---------|
|         |   | 50 mg kg <sup>-1</sup> | 100 mg kg <sup>-1</sup> |    | 50 mg kg <sup>-1</sup>   | 100 mg kg <sup>-1</sup> |          | 50 mg kg <sup>-1</sup>  | 100 mg kg <sup>-1</sup> |         | 50 mg kg <sup>-1</sup>          |         | 100 mg kg <sup>-1</sup> |         |              |         |
| Soil 1  | 3 | ±                      | -22 ± 45                | ab | -33 ± 33                 | ab                      | 50 ± 28  | a                       | -4 ± 2                  | def     | 1 ± 5                           | c       | 0,07 ± 0,40             | c       | 1,09 ± 0,51  | c       |
| Soil 10 | 3 | 3 ± 28                 | 41 ± 22                 | a  | 14 ± 8                   | a                       | 12 ± 4   | ab                      | 104 ± 12                | a       | 47 ± 6                          | ab      | 16,21 ± 0,51            | ab      | 26,82 ± 2,57 | b       |
| Soil 11 | 3 | -87 ± 151              | -109 ± 12               | b  | -16 ± 21                 | a                       | -3 ± 6   | b                       | -43 ± 14                | f       | -13 ± 5                         | c       | 1,72 ± 0,90             | c       | 0,33 ± 0,93  | c       |
| Soil 12 | 3 | -17 ± 13               | 26 ± 59                 | ab | 6 ± 3                    | a                       | 5 ± 1    | b                       | -3 ± 15                 | def     | -4 ± 1                          | c       | 0,23 ± 0,07             | c       | 0,39 ± 0,25  | c       |
| Soil 2  | 3 | -10 ± 10               | 0 ± 11                  | ab | -10 ± 14                 | a                       | -4 ± 7   | b                       | -27 ± 3                 | def     | -5 ± 1                          | c       | 0,09 ± 0,32             | c       | 1,67 ± 1,33  | c       |
| Soil 3  | 3 | 28 ± 30                | 14 ± 53                 | ab | 17 ± 20                  | a                       | 6 ± 15   | ab                      | 5 ± 2                   | cde     | 5 ± 0                           | c       | -0,70 ± 0,53            | c       | 0,48 ± 0,34  | c       |
| Soil 4  | 3 | 34 ± 16                | 0 ± 5                   | ab | 14 ± 9                   | a                       | -4 ± 7   | b                       | -8 ± 2                  | def     | -1 ± 1                          | c       | 0,25 ± 0,09             | c       | 0,50 ± 0,15  | c       |
| Soil 5  | 3 | -26 ± 83               | -157 ± 127              | ab | 3 ± 19                   | a                       | -23 ± 8  | bc                      | -16 ± 2                 | def     | -2 ± 1                          | c       | -0,07 ± 0,16            | c       | 0,13 ± 0,15  | c       |
| Soil 6  | 3 | -16 ± 26               | -79 ± 47                | ab | -120 ± 8                 | b                       | -50 ± 11 | c                       | 28 ± 12                 | bcd     | 3 ± 3                           | c       | 0,01 ± 0,07             | c       | -0,37 ± 0,24 | c       |
| Soil 7  | 3 | 21 ± 20                | 24 ± 50                 | ab | 1 ± 1                    | a                       | 2 ± 11   | b                       | 30 ± 12                 | bcd     | 18 ± 2                          | bc      | 4,34 ± 1,93             | bc      | 5,28 ± 0,83  | c       |
| Soil 8  | 3 | 54 ± 14                | 48 ± 6                  | a  | 23 ± 13                  | a                       | 17 ± 5   | ab                      | 58 ± 5                  | ab      | 54 ± 8                          | ab      | 26,95 ± 6,11            | a       | 34,18 ± 2,71 | a       |
| Soil 9  | 3 | 27 ± 30                | 47 ± 16                 | a  | 28 ± 52                  | a                       | 12 ± 4   | ab                      | 50 ± 7                  | bc      | 76 ± 23                         | a       | 11,31 ± 5,01            | bc      | 30,57 ± 1,98 | ab      |
| ANOVA   |   | NS                     | < 0,05                  |    | < 0,001                  |                         | < 0,01   |                         | P value                 | < 0,001 |                                 | < 0,001 |                         | < 0,001 |              | < 0,001 |

Mean ± standard error

NS, not significant

Means followed by the same letter are not significantly different according to the Tukey test at P < 0.05

The subindices for the P fertilizer replacement value abbreviation (PFRV) indicates: DM, on a dry matter basis, Puptake, on a P uptake basis, and OlsenP on a Olsen P after crop basis
