# Supplementary material for: Circular economy approach in phosphorus fertilization based on vivianite must be tailored to soil properties
Source: Copernicus journal article supplement (doi:10.5194/soil-11-975-2025), 2025-11-28
Supplement: Supplementary file [file soil-11-975-2025-supplement-title-page.pdf › soil-11-975-2025-supplement-title-page.pdf]

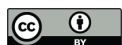

## *Supplement of*

# **Circular economy approach in phosphorus fertilization based on vivianite must be tailored to soil properties**

**Tolulope Ayeyemi et al.**

*Correspondence to:* Tolulope Ayeyemi (tolulopeayeyemi@gmail.com)

- soil-11-975-2025-supplement-title-page.pdf
- Supplementary tables
  - Table S1.pdf
  - Table S2.pdf

The copyright of individual parts of the supplement might differ from the article licence.
